# Supplementary material
Source: publisher figshare collection journal article supplement (https://springernature.figshare.com/articles/dataset/_/7598120)
Supplement: Supplementary file [file 14106395]

**Additional file 5.** Alignment of basic and hinge regions of 95 peanut bZIP proteins. Conserved amino acids are boxed in red. The different amino acid residues at -10 and -18 positions like K and I are colored in blue.

| GROUP    | bZIP No.   | ← BASIC REGION →                            | ← HINGE →           |
|----------|------------|---------------------------------------------|---------------------|
|          |            | -40    -25    -20    -15    -10    -5    -1 |                     |
|          |            | *    *    *    *    *    *    *             |                     |
| A        | AdbZIP13   | QGIDRKQKRM                                  | AKNRESAAKSR         |
|          | AdbZIP29   | KTVERRQKRM                                  | IKNRESAAARS         |
|          | AdbZIP33   | VVVERRQRRM                                  | LKNRESAAARS         |
|          | AdbZIP39   | KAAQQRQRRM                                  | LKNRESAAARS         |
|          | AdbZIP42   | KVVERRQRRM                                  | LKNRESAAARS         |
|          | AdbZIP48   | KTVERRQKRM                                  | IKNRESAAARS         |
|          | AibZIP12   | KATLQKQRRM                                  | LKNRESAAARS         |
|          | AibZIP2    | RICENISKRM                                  | MKNRESAAARS         |
|          | AibZIP23   | KTVERRQKRM                                  | IKNRESAAARS         |
|          | AibZIP28   | VVVERRQRRM                                  | LKNRESAAARS         |
|          | AibZIP31   | KAAQQRQRRM                                  | LKNRESAAARS         |
|          | AibZIP35   | KVVERRQRRM                                  | LKNRESAAARS         |
|          | AibZIP43   | KTVERRQKRM                                  | IKNRESAAARS         |
|          | AibZIP33   | KASLQKQRRM                                  | LKNRESAAARS         |
| AdbZIP2  | RICENISKRM | MKNRESAAARS                                 |                     |
| B        | AdbZIP45   | DDDEK                                       | RKARLMRNRESAQLSRQRK |
|          | AibZIP40   | DDDEK                                       | RKARLMRNRESAQLSRQRK |
| C        | AdbZIP23   | PTDAKRVRRM                                  | LSNRESARRSR         |
|          | AdbZIP30   | PIDMKRLRRK                                  | VSNRESARRSR         |
|          | AdbZIP37   | PADVKKVRRM                                  | LSNRESARRSR         |
|          | AdbZIP44   | PVDVKRLRRK                                  | ESNRESARRSR         |
|          | AibZIP24   | ---MKRLRRK                                  | VSNRESARRSR         |
|          | AibZIP30   | PADVKKVRRM                                  | LSNRESARRSR         |
| D        | AdbZIP20   | AVDQKTMRR                                   | LAQNREAAARKS        |
|          | AdbZIP25   | KADQKTLRR                                   | LAQNREAAARKS        |
|          | AdbZIP34   | PLDAKTLRR                                   | LAQNREAAARKS        |
|          | AdbZIP35   | KTDQKSLRR                                   | LAQNREAAARKS        |
|          | AdbZIP38   | HEDQKTLRR                                   | LAQNREAAARKS        |
|          | AdbZIP40   | KPIDKIQR                                    | LAQNREAAARKS        |
|          | AdbZIP8    | TPDPKTLRR                                   | LAQNREAAARKS        |
|          | AdbZIP9    | AVDAKTLRR                                   | LAQNREAAARKS        |
|          | AibZIP18   | AVDQKTMRR                                   | LAQNREAAARKS        |
|          | AibZIP20   | KADQKTLRR                                   | LAQNREAAARKS        |
|          | AibZIP29   | PLDAKTLRR                                   | LAQNREAAARKS        |
| G        | AdbZIP15   | NVTRDRKENS                                  | LNRELARRSRLR        |
|          | AdbZIP17   | ERELKRQRK                                   | QSNRESARRSRLR       |
|          | AdbZIP19   | ERELKRQRK                                   | QSNRESARRSRLR       |
|          | AdbZIP4    | ERELKRERRK                                  | QSNRDSARRSRLR       |
|          | AdbZIP49   | NDEIRKERK                                   | RKLSNRESAKRSRLR     |
|          | AdbZIP50   | ERDLKRQRK                                   | QSNRESARKSRLR       |
|          | AdbZIP6    | ERELKRERRK                                  | QSNRESARRSRLR       |
|          | AdbZIP7    | ERDLKRQRK                                   | QSNRESARKSRLR       |
|          | AibZIP15   | ERELKRQRK                                   | QSNRESARRSRLR       |
|          | AibZIP17   | ERELKRQRK                                   | QSNRESARRSRLR       |
| H        | AdbZIP14   | DKEYRRLK                                    | RLLRNRVSAQQARERK    |
|          | AdbZIP41   | DKENKRLK                                    | RLLRNRVSAQQARERK    |
|          | AdbZIP47   | DKENKRLK                                    | RLLRNRVSAQQARERK    |
|          | AibZIP36   | DKENKRLK                                    | RLLRNRVSAQQARERK    |
|          | AibZIP42   | DKENKRLK                                    | RLLRNRVSAQQARERK    |
| I        | AdbZIP1    | TIDPKRAKR                                   | ILANRQSAARS         |
|          | AdbZIP11   | MMDPKRAKR                                   | ILANRQSAARS         |
|          | AdbZIP22   | TIDPKRAKR                                   | ILANRQSDTRS         |
|          | AdbZIP27   | MADPKRAKR                                   | ILANRVSAARS         |
|          | AdbZIP32   | TIDPKRAKR                                   | ILANRQSAARS         |
|          | AdbZIP43   | TVDPKRAKR                                   | ILANRKSAAARS        |
|          | AibZIP11   | MMDPKRAKR                                   | ILANRQSAARS         |
|          | AibZIP19   | MADPKRAKR                                   | ILANRVSAARS         |
|          | AibZIP26   | TIDLKRAKR                                   | ILANRQSAARS         |
|          | AibZIP3    | TIDPKRAKR                                   | ILANRQSAARS         |
| S        | AdbZIP10   | LMDQKRKR                                    | KRMISNRESARRSR      |
|          | AdbZIP12   | IMDQKRKR                                    | KRMQSNRESARRSR      |
|          | AdbZIP16   | ILNERKHRR                                   | MISNRESARRSR        |
|          | AdbZIP18   | VMNERKRRR                                   | KISNRESARRSR        |
|          | AdbZIP21   | VIDERKQRR                                   | MISNRESARRSR        |
|          | AdbZIP24   | VLDERKRRK                                   | MLSNRESARRSR        |
|          | AdbZIP26   | LMDQKKRKR                                   | KQSNRESARRSR        |
|          | AdbZIP3    | -----MI                                     | SNRESARRSR          |
|          | AdbZIP31   | SSHERKIRR                                   | KQSNRESARRSR        |
|          | AdbZIP36   | VMDERKRRK                                   | MLSNRESARRSR        |
|          | AdbZIP46   | LINERKHRR                                   | MISNRESARRSR        |
|          | AdbZIP5    | VIDERKRRR                                   | MLSNRESARRSR        |
|          | AibZIP1    | IDERRQRR                                    | MISNRESARRSR        |
|          | AibZIP10   | LMDQKRKR                                    | KRMISNRESARRSR      |
|          | AibZIP13   | TMDQKRKR                                    | KRMQSNRESARRSR      |
|          | AibZIP14   | ILNERKHRR                                   | MISNRESARRSR        |
|          | AibZIP16   | VMDERKRRR                                   | KISNRESARRSR        |
| AibZIP25 | STHERKIRR  | KQSNRESARRSR                                |                     |
| AibZIP27 | SSEERKLRR  | MQSNRESARRSR                                |                     |
| AibZIP41 | LINERKHRR  | MISNRESARRSR                                |                     |
| AibZIP5  | VIDERKRRR  | MLSNRESARRSR                                |                     |
| U        | AdbZIP28   | EKEARRIR                                    | RRILANRESARQT       |
|          | AibZIP22   | EKEARRIR                                    | RRILANRESARQT       |
|          | AibZIP7    | EPVSKLLR                                    | KMRNRDAARSRERK      |
